# Discovering complete quasispecies in bacterial genomes

Frederic Bertels<sup>\*1</sup>, Chaitanya S. Gokhale<sup>\*</sup> and Arne Traulsen<sup>\*</sup>

<sup>\*</sup>Department of Evolutionary Theory, Max Planck Institute for Evolutionary Biology, August-Thienemann-Str. 2, 24306, Plön, Germany

**ABSTRACT** Mobile genetic elements can be found in almost all genomes. Possibly the most common non-autonomous mobile genetic elements in bacteria are REPINs that can occur hundreds of times within a genome. The sum of all REPINs within a genome are an evolving populations because they replicate and mutate. We know the exact composition of this population and the sequence of each member of a REPIN population, in contrast to most other biological populations. Here, we model the evolution of REPINs as quasispecies. We fit our quasispecies model to ten different REPIN populations from ten different bacterial strains and estimate duplication rates. We find that our estimated duplication rates range from about  $5 \times 10^{-9}$  to  $37 \times 10^{-9}$  duplications per generation per genome. The small range and the low level of the REPIN duplication rates suggest a universal trade-off between the survival of the REPIN population and the reduction of the mutational load for the host genome. The REPIN populations we investigated also possess features typical of other natural populations. One population shows hallmarks of a population that is going extinct, another population seems to be growing in size and we also see an example of competition between two REPIN populations.

**KEYWORDS** REP sequences; mobile genetic elements; evolution; bacteria; quasispecies

## Introduction

Repetitive sequences are common in most bacterial genomes, but rare compared to most eukaryotic genomes (Jurka *et al.* 2007; Versalovic *et al.* 1991). A large proportion of repetitive sequences in bacterial genomes are the result of self-replicating DNA sequences. These sequences usually encode an enzyme called a transposase that specifically copies its own sequence (Mahillon and Chandler 1998). There are also repetitive sequences that do not encode a transposase themselves, but are copied by a transposase that is encoded elsewhere in the genome. These elements are referred to as MITEs (Miniature Inverted repeat Transposable Elements) (Wessler *et al.* 1995). MITEs were first described in plant genomes (Bureau and Wessler 1994) and later also in bacteria (Oggioni and Claverys 1999). Recently, it has been shown that REP (Repetitive Extragenic Palindromic) sequences (Higgins *et al.* 1982) or more specifically REPINs (REP doublets forming hairpINs) (Bertels and Rainey 2011b), one of

the most abundant repeat families in bacteria, are also MITEs (Nunvar *et al.* 2010; Bertels and Rainey 2011b,a; Ton-Hoang *et al.* 2012).

REP sequences are about 25 bp long sequences that are highly abundant in bacterial genomes (Higgins *et al.* 1982; Aranda-Olmedo *et al.* 2002; Silby *et al.* 2009). They contain a short imperfect palindromic sequence that can form short hairpins in single stranded DNA or RNA. REP sequences mostly occur in non-coding DNA between genes and are part of REPINs. REPINs in most *Pseudomonas* strains consist of two REP sequences in inverted orientation separated by a highly diverse nucleotide sequence (Bertels and Rainey 2011b). REPINs are a replicative unit and are mobilized by RAYTs (REP Associated tYrosine Transposases) (Nunvar *et al.* 2010; Bertels and Rainey 2011b; Ton-Hoang *et al.* 2012). Although the structure of REPINs in *Pseudomonas* is well defined, for REPINs in *E. coli* there has not been an extensive study on what exactly comprises the replicative unit.

The occurrence of REP sequences and associated functions have been described in many different bacterial genomes (Higgins *et al.* 1982; Aranda-Olmedo *et al.* 2002; Silby *et al.* 2009). However, their evolution has rarely been studied in detail (Bertels and Rainey 2011a,b) and nothing is known about the dupli-

54 cation rates of REPINs. Although, we know that closely related  
55 *E. coli* strains contain varying numbers of REP sequences, this  
56 may not be a direct result of replication. Instead it may be more  
57 likely that it is a consequence of the extremely dynamic genome  
58 composition of *E. coli* (Touchon *et al.* 2009), where REP sequences  
59 get deleted or inserted together with other parts of the genome.  
60 However, the lack of evidence for novel REPIN insertions proba-  
61 bly means that duplication rates are low, despite the presence  
62 of hundreds of REPINs in some genomes (Bertels and Rainey  
63 2011b).

64 As it is difficult to study the evolution of the complete REPIN  
65 sequence due to the highly diverse loop region (which is proba-  
66 bly strongly affected by recombination), we model the evolution  
67 of the most conserved 25bp at each end of the REPIN. Here we  
68 infer REPIN duplication rates by modeling the most abundant  
69 REPINs in a bacterial genome as a quasispecies in equilibrium.  
70 The beauty of studying REPINs in bacterial genomes is that we  
71 know the exact composition of the population at the time of  
72 genome sequencing, something that is impossible to achieve for  
73 almost any other population study.

74 We first fit the equilibrium of our quasispecies model for a  
75 REPIN population from *Pseudomonas fluorescens* SBW25 and later  
76 for nine other bacterial genomes. Our results show that despite  
77 the large divergence between the bacterial strains, our inferred  
78 duplication rates are very similar and very low. All rates fall into  
79 a narrow margin between one replication in about  $31 \times 10^6$  and  
80  $200 \times 10^6$  host divisions. Hence, if a bacterium were to divide  
81 every 40 minutes, it would take about 2359 years for a specific  
82 REPIN duplication to fix in the population. The astonishing  
83 rarity of these events may explain the lack of evidence for novel  
84 REPIN insertions in bacterial genomes.

## 85 Materials and Methods

### 86 Quasispecies model

87 The quasispecies model describes the mutation-selection balance  
88 of a set of similar sequences that evolve on a fitness landscape.  
89 On this landscape, each sequence has a certain fitness. Sequences  
90 with high fitness leave many offspring, sequences with low  
91 fitness leave few offspring. The fitness landscape is traversed  
92 by acquiring mutations (Eigen 1971; Eigen and Schuster 1977;  
93 Nowak 1992).

94 The quasispecies model has been applied previously mostly  
95 to model viral populations (Seifert *et al.* 2015; Domingo and  
96 Schuster 2016). Here, we model REPIN sequences that mutate  
97 and duplicate: the fitness in the quasispecies model corresponds  
98 to the REPIN duplication rate and the model's mutation rate to  
99 the genome mutation rate. We assume that the REPIN popula-  
100 tion in our genome is a quasispecies in equilibrium. The most  
101 abundant sequence in our population is our master sequence.  
102 With increasing genetic distance to the master sequence, fitness  
103 changes. For our model we assume five discrete fitness classes.  
104 The 0<sup>th</sup> class contains the master sequence. Sequences differing  
105 in 1, 2 or 3 positions are in the next three classes. The remaining  
106 sequences are in the 4<sup>th</sup> fitness class. The frequencies of the se-  
107 quences belonging to each of these classes  $i$  are given by  $x_i$ . The  
108 population evolves to a mutation-selection balance as described  
109 by the standard quasispecies equation (Page and Nowak 2002;  
110 Bull *et al.* 2005)

$$\dot{x}_i = \sum_{j=0}^n x_j f_j q_{ji} - x_i \phi. \quad (1)$$

111 In our case  $n$  equals 4. The fitness of sequences belonging to  
112 each class  $j$  is given by  $f_j$  and the average fitness of the popu-  
113 lation by  $\phi = \sum_{i=0}^n x_i f_i$ . The probability that a sequence from  
114 class  $j$  mutates into  $i$  is given by  $q_{ji}$ . In our model, sequences  
115 can only acquire a single mutation per time step. Hence,  $\mathbf{Q}$  is a  
116 tri-diagonal matrix with non-zero entries in the main diagonal  
117 (no mutation) the first diagonal above (sequence acquires an ad-  
118 ditional mutation) and the first diagonal below (back mutation).  
119 For a mutation rate  $\mu$  and a sequence length  $L$ , the probability  
120 of transitioning to the next mutation class  $i + 1$  is  $\mu(L - i\frac{1}{3})$  and  
121 to the previous mutation class  $i - 1$  is  $i\mu\frac{1}{3}$ . The fourth mutation  
122 class is the only class where we assume a back mutation rate of  
123 zero — the exact value would depend on the frequency distribu-  
124 tion of the sequences that differ by more than three mutations  
125 to the master sequence. We also assume that the mutation rate  
126 of REPINs only depends on the host mutation rate. Mutations  
127 that occur during the duplication process are assumed to be  
128 negligible.

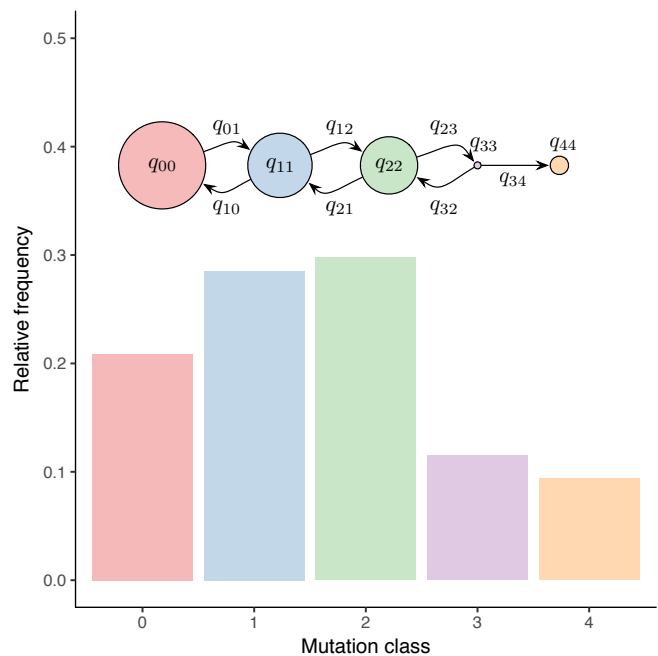

129 **Figure 1 Exemplar results for a quasispecies model.** For a  
130 mutation rate of  $\mu = 8.9 \times 10^{-11}$ , and the fitnesses as given  
131 in Table 1 (1+scaled duplication rate), we illustrate the equi-  
132 librium distribution of the relative frequencies of *P. fluorescens*  
133 SBW25 REPINs. The radii of the circles indicate the duplica-  
134 tion rate, which is the quasispecies fitness subtracted by one.  
135 Note that the actual fitness differences are extremely minute  
136 at the level of  $10^{-9}$ . The cartoon merely illustrates the archi-  
137 tecture of the fitness landscape. The mutation probabilities are  
138 given by  $(q_{ij})$  while self-replication occurs with probability  $q_{ii}$ .

### 139 Parameterizing the quasispecies model

140 We set the fitness of the highest mutation class to one,  $f_4 = 1$ . For  
141 a given set of equilibrium sequence frequencies, we can then cal-  
142 culate the relative fitness of the remaining four mutation classes  
143 for a given mutation rate (see File S7). For all our bacteria we  
144 assume a host mutation rate of  $8.9 \times 10^{-11}$ , which was inferred  
145 for *E. coli* (Wielgoss *et al.* 2011). The duplication rate is then the  
146 calculated fitness for each mutation class subtracted by one.

## 137 **Stochastic simulations**

138 For each REPIN population, we performed a stochastic simu- 198  
139 lation to determine the extent of stochastic fluctuation on the 199  
140 equilibrium frequencies. These fluctuations mainly depend on 200  
141 the REPIN population size. As we cannot simulate evolution 201  
142 for the genome mutation rate, we scaled our fitness values up 202  
143 to fit a mutation rate of  $10^{-4}$ . With the new mutation rate, each 203  
144 discrete time step corresponds to  $g = \frac{10^{-4}}{8.9 \times 10^{-11}} \approx 10^6$  bacte- 204  
145 rial generations. Because we assume multiplicative fitness, the 205  
146 fitness values at a mutation rate of  $10^{-4}$  are comparable to  $(f_i)^g$ . 206

147 We modeled evolution with a Wright-Fisher process (Ewens 206  
148 1979). We start the simulation with a clonal population of the 207  
149 master sequence at carrying capacity, which is set to the num- 208  
150 ber of REPINs observed in the genome. The number of off- 209  
151 spring each sequence leaves in each generation is equal to the 210  
152 sequence's fitness. If the number of offspring exceeds the carry- 211  
153 ing capacity, a random selection of the same size as the carrying 212  
154 capacity survives to the next time point. We modeled a total of 213  
155  $10^9$  generations.

156 We repeated each simulation 100 times and measured the 214  
157 proportion of simulations where the 0<sup>th</sup> mutation class persisted 215  
158 at a frequency of more than 10%. 216

## 159 **Determining REPIN populations**

160 We extracted REPIN populations from 10 bacterial genomes 217  
161 the following way: For each of these genomes we determined 218  
162 the most common 25 bp long sequence. We then recursively 219  
163 searched the genome for all sequences that have a Hamming 220  
164 distance of 2 to all identified sequences until no more sequences 221  
165 were found. We call these sequences REP sequences. For all 222  
166 REP sequences we determined whether they were part of a se- 223  
167 quence cluster by checking whether there were any additional 224  
168 occurrences in a vicinity of 130bp. From these sequence clus- 225  
169 ters we extracted REPINs. REPINs consist of two adjacent REP 226  
170 sequences that are found in opposite directions (one on the pos- 227  
171 itive strand the other on the negative DNA strand, also called 228  
172 inverted repeats) in the DNA sequence. The REPINs we found 229  
173 were extracted and joined together facing the same direction in 230  
174 alphabetical order. REP sequences found as direct repeats or as 231  
175 singlets in the genome were also extracted (as single sequences). 232  
176 We added another 25bp of adenine nucleotides at the end of 233  
177 each REP singlet to make them easily comparable with REPINs. 234

## 178 **Clustering REPIN sequences**

179 REPIN populations can be represented as sequence networks. 235  
180 In these networks, each node represents a sequence. Vertices 236  
181 between nodes exist if the Hamming difference between the se- 237  
182 quence pair is one. Because REPIN populations in *Pseudomonas* 238  
183 do not always evolve on a single peak due to the presence of mul- 239  
184 tiple RAYTs (transposases) in the genome, we extracted subpop- 240  
185 ulations clustered around the master sequence. We determined 241  
186 these subpopulations for all *Pseudomonas* strains by applying a 242  
187 Markov clustering algorithm implemented in the MCL package 243  
188 (van Dongen 2000) with the inflation parameter set to 1.2 to the 244  
189 sequence network. The MCL algorithm simulates random walks 245  
190 on a stochastic graph by alternating between expansion and 246  
191 inflation operations, where larger inflation parameters will lead 247  
192 to more fragmented networks

193 We used the largest REPIN cluster for our analyses. Since 248  
194 these clusters exclude decayed sequences far from the master 249  
195 sequences, we also included all sequences with a Hamming dis- 250  
196 tance of two to any sequence in the cluster. Of the sequences 251

197 identified in the last step we only included instances that oc- 252  
198 curred less than three times in the genome. Sequences that occur 253  
199 more than three times in the genome are likely to have been 254  
200 duplicated by other RAYTs.

## 201 **Inferring an error threshold**

202 The error threshold defines a critical point in a quasispecies 255  
203 where with the given fitness values and mutation rate it is im- 256  
204 possible to maintain the master sequence. Here we deviate 257  
205 slightly from this definition as we define the error threshold as 258  
206 the point where the master sequence cannot be maintained at a 259  
207 relative frequency of more than 1%. To determine the duplica- 260  
208 tion rate at which we reach our error threshold, we decrease all 261  
209 fitness values in increments of  $1 \times 10^{-12}$ . As soon as one of the 262  
210 five fitness parameter reaches one, this parameter will remain 263  
211 constant for the remainder of the procedure. We performed this 264  
212 procedure for the fitness landscape of each species separately.

## 213 **Data Availability**

214 All genomes are publicly available on Genbank 265  
215 (<https://www.ncbi.nlm.nih.gov/genbank/>) under the 266  
216 following accession numbers:

| Species Name                                | NCBI Accession number |
|---------------------------------------------|-----------------------|
| <i>P. syringae</i> pv. <i>tomato</i> DC3000 | NC_004632.1           |
| <i>P. synxantha</i> BG33R                   | CM001514              |
| <i>P. fluorescens</i> A506                  | NC_017911             |
| <i>P. fluorescens</i> SBW25                 | NC_012660.1           |
| <i>P. putida</i> GB1                        | NC_010322.1           |
| <i>E. coli</i> 536                          | NC_008253.1           |
| <i>E. coli</i> K-12 MG1655                  | CP014225.1            |
| <i>E. coli</i> UTI89                        | NC_007946.1           |
| <i>E. coli</i> B REL606                     | NC_012967.1           |
| <i>E. coli</i> UMN026                       | NC_011751.1           |

218 We included eight supplemental files. File S1 contains de- 267  
219 tailed descriptions of all supplemental files. File S2 contains 268  
220 the sequence and frequency of the most common 25 bp long 269  
221 sequence, the gene name of the flanking RAYT and the number 270  
222 of RAYTs, in all of the bacteria analyzed in this study. File S3 271  
223 contains the modeling and simulation results for all ten REPIN 272  
224 populations we analyzed in our study. File S4 contains the Pro- 273  
225 portion of symmetric REPINs in all identified sequences from 274  
226 all studied strains. File S5 contains the duplication rates and 275  
227 equilibrium frequencies for each of the 10 REPIN populations 276  
228 at the error threshold. File S6 contains the Mathematica code 277  
229 we used to calculate equilibrium frequencies, fitness values and 278  
230 error thresholds for all 10 REPIN populations. File S7 contains 279  
231 the same Mathematica code as pdf. File S8 contains the sequence 280  
232 frequencies of the different mutation classes for all 10 REPIN 281  
233 populations. 282

## 234 **Results and Discussion**

### 235 **REPINs in *Pseudomonas fluorescens* SBW25.**

236 In *Pseudomonas fluorescens* SBW25 REPINs consist of two in- 283  
237 verted highly conserved sequences that are 25 bp in length, 284



238 separated by a sequence of varying length that shows low levels  
 239 of conservation (Bertels and Rainey 2011b,a). The processes that  
 240 lead to the varying levels of conservation in REPINs are not  
 241 very well understood. Hence, we will focus our analysis only on  
 242 the most conserved 25 bp flanking the REPIN. These sequences  
 243 have been discovered a long time ago in *E. coli* and have been  
 244 called REP sequences (Stern *et al.* 1984). To find the most con-  
 245 served parts of the REPIN, we determined the most common  
 246 25bp long sequence in the SBW25 genome. This sequence occurs  
 247 265 times and is usually part of a REPIN (Bertels and Rainey  
 248 2011b). We then add all sequences that differ in no more than  
 249 two positions to this sequence. For the identified sequences  
 250 we do the same and so on, until we can find no more new se-  
 251 quences in the genome. The resulting REP population contains  
 252 932 REP sequences. For these sequences, we determine whether  
 253 they are part of a REP cluster, by looking for all occurrences in  
 254 the vicinity of 130bp. From these clusters, we extract adjacent  
 255 pairs of inverted REP sequences or REPINs. REP singlets were  
 256 also extracted but marked with a 25bp long adenine sequence.  
 257 The relationship between REPINs is visualized as a sequence  
 258 network (Figure 2).

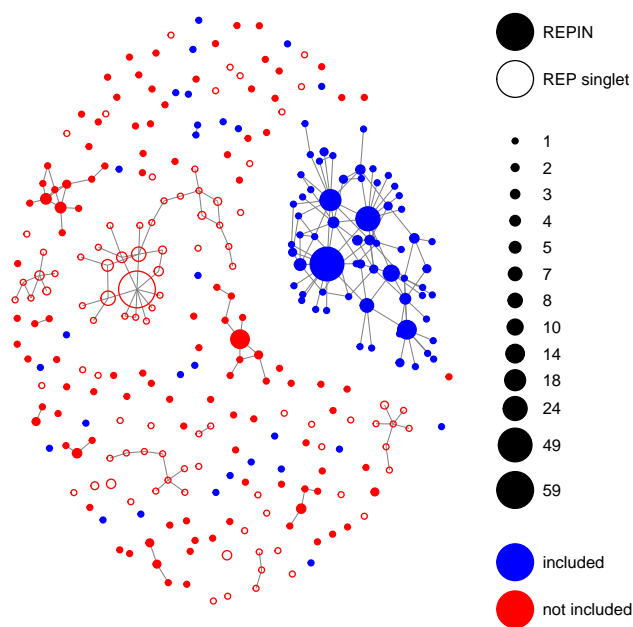

**Figure 2 Structure of the REPIN population in SBW25.** REPINs that differ in exactly one position are connected. REP sequences that do not form REPINs (e.g. singlets) are shown as empty circles. Blue “included” nodes belong to the REPIN population for which we infer duplication rates. Red (“not included”) nodes were excluded from the analysis because they likely evolve on a more complex fitness landscape that is more difficult to model. The size of the nodes indicates the frequency of the corresponding sequence in the SBW25 genome.

259 The population network in Figure 2 has many sequence hubs  
 260 distantly related and not connected to the master sequence. In-  
 261 stead of a very rugged activity landscape of a single RAYT (the  
 262 transposase responsible for duplicating REPINs), we think it  
 263 is more likely that these hubs were created by the concurrent  
 264 activities of multiple RAYT transposases (the SBW25 genome  
 265 contains three RAYT genes). As it is impossible to accurately

266 model this complexity for small REPIN populations, we decided  
 267 to reduce the REPIN population to all sequences that are part of  
 268 the largest cluster as well as all sequences that are at most 2bp  
 269 different from any sequence that is part of the cluster.

270 The “included” subpopulation selected in Figure 2 has 235  
 271 members. We will model this subpopulation as quasispecies,  
 272 with five sequence classes, that are 0, 1, 2, 3 and more than 3  
 273 mutations away from the master sequence. In our model we  
 274 will also assume that the population is in equilibrium and the  
 275 frequencies of the sequences we observe are steady state fre-  
 276 quencies. The mutation rate in our model was chosen to be high  
 277 to facilitate stochastic simulations of the evolutionary process.  
 278 The fitness values for each mutation class were calculated from  
 279 the quasispecies equation for the sequence frequencies observed  
 280 in SBW25 (Table 1).

281 The quasispecies equation provides us with a set of fitness  
 282 values that perfectly recapitulate the observed frequencies for  
 283 infinitely large populations (Figure 3A). However, REPIN popu-  
 284 lations are relatively small, which means that population size  
 285 will have a strong effect during REPIN evolution. To estimate  
 286 stochastic effects, we used the calculated fitness parameters for  
 287 each mutation class to perform a stochastic Wright-Fisher simu-  
 288 lation with a maximum of 235 individuals (Figure 3B). Our  
 289 simulation shows that the distributions of the mutation classes  
 290 are wide, particularly for the master sequence, which is probably  
 291 an effect of the small population size (Figure 3C).

292 The rate at which duplications occur can be calculated from  
 293 the inferred fitness values. We calculate the duplication rate from  
 294 these fitness values by subtracting one, as “one” is the part of the  
 295 fitness in our model that corresponds to REPIN maintenance.  
 296 The duplication rate we inferred for the master sequence in  
 297 SBW25 is  $9.8 \times 10^{-9}$  per generation and per sequence.

298 However, this means that for the 3<sup>rd</sup> mutation class, we infer  
 299 negative duplication rates (Table 1). Unless there is an active  
 300 deletion process for these mutation classes, these duplication  
 301 rates are unlikely to be accurate. Alternatively, it is possible that  
 302 members of the 4<sup>th</sup> mutation class are more likely to replicate  
 303 than members of the 3<sup>rd</sup> mutation class. This could be true  
 304 as it is possible that these sequences are also recognized by a  
 305 second RAYT transposase in the SBW25 genome. To alleviate  
 306 this problem, we can simply scale up all mutation classes so  
 307 the lowest fitness is 1. This leads to a higher duplication rate of  
 308 the master sequence’s mutation class of  $11.3 \times 10^{-9}$  instead of  
 309  $9.8 \times 10^{-9}$  (Table 1).

310 If we assume one cell division to take 40 minutes and novel  
 311 REPIN insertions to be selectively neutral then it would take  
 312 about 6734 years until a novel REPIN master sequence fixes in  
 313 the SBW25 population. This seems to be a surprisingly long  
 314 time, but it would explain, why, to our knowledge, there is no  
 315 report of novel REPIN insertions within genomes. It may also  
 316 explain why REPINs can be maintained for long times within  
 317 a genome without being selected against because due to the  
 318 rarity of duplication events the negative fitness effects resulting  
 319 from transposition (e.g. transposition is likely to disrupt genes  
 320 because about 88% of the SBW25 genome are coding regions  
 321 (Silby *et al.* 2009)) are probably negligible.

#### 322 **REPIN duplication rates in other bacteria.**

323 We also calculated duplication rates for four more *Pseudomonas*  
 324 strains and five more *E. coli* strains. The *E. coli* strains we chose  
 325 were quite distantly related to each other and belong to phy-  
 326 logroups A, B2 and D. The *Pseudomonas* strains we chose are very

**Table 1 Inferred REPIN duplication rates in *P. fluorescens* SBW25.**

| Mutation class | Inferred Duplication Rate $\lambda_i (\times 10^{-9})^a$ | Scaled Duplication Rate $\tilde{\lambda}_i (\times 10^{-9})^b$ |
|----------------|----------------------------------------------------------|----------------------------------------------------------------|
| 0              | 9.8                                                      | 11.3                                                           |
| 1              | 6.5                                                      | 8.1                                                            |
| 2              | 5.5                                                      | 7.1                                                            |
| 3              | -1.6                                                     | 0                                                              |
| 4              | 0                                                        | 1.6                                                            |

<sup>a</sup> We identified a master sequence in the data and inferred the frequency of the different mutation classes. We use the equilibrium of our quasispecies model to calculate the associated fitness values  $f_i$  and setting  $f_4$  to 1, where  $\lambda_i$  is  $f_i - 1$ .

<sup>b</sup> The scaled duplication rate is:  $\tilde{\lambda}_i = \frac{f_i}{\min(f_j)} - 1$ .

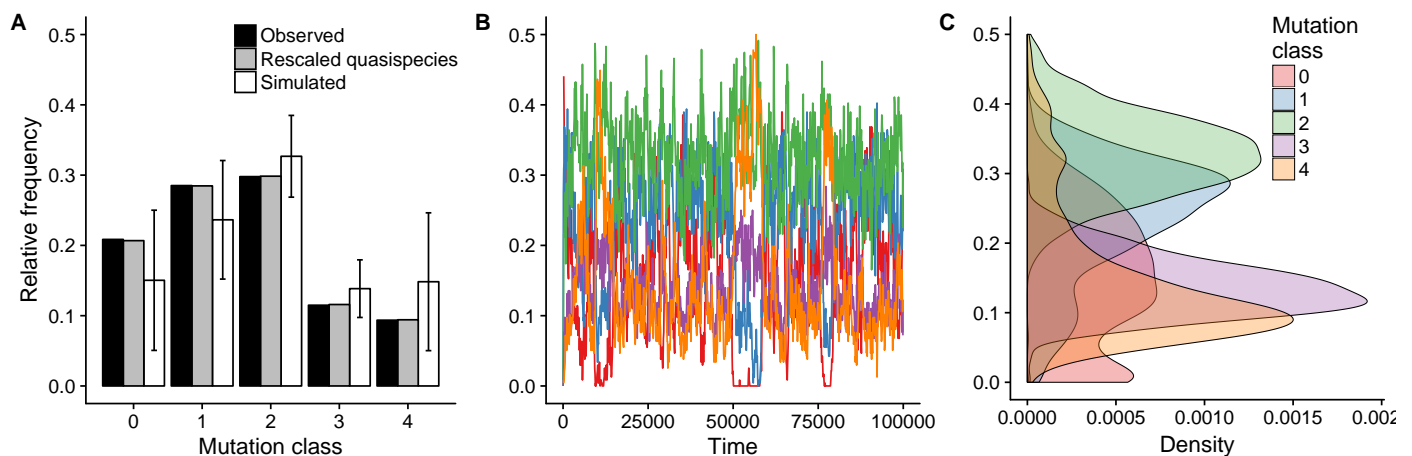

**Figure 3 Inferred and observed steady state REPIN frequencies in *P. fluorescens* SBW25.** (A) Shows the observed frequencies at a mutation rate of  $8.9 \times 10^{-11}$ . We rescaled time to allow us to do simulations at a mutation rate of  $10^{-4}$ . The resulting quasispecies equilibria agree almost perfectly with the observed frequencies. A simulation of a single Wright-Fisher process ( $10^5$  generations) with the same fitness values allows us to infer the variation of these frequencies. (B) Relative frequencies obtained from the Wright-Fisher process using the scaled fitness values for  $10^5$  generations. (C) Density plot of the relative frequencies of the mutation classes from the Wright-Fisher process.

327 distantly related to each other as well as to *E. coli* (Figure 4A). To  
328 get an idea about how distantly related the individual strains  
329 are, we gauge the time that has passed since the strains diverged  
330 by measuring the 16S rDNA divergence (Ochman and Wilson  
331 1987; Ochman *et al.* 1999). Ochman *et al.* estimated that it takes  
332 about 50 million years for the 16S rDNA to diverge by 1%. Ac-  
333 cording to these estimates, the most recent common ancestor  
334 (MRCA) of the *E. coli* strains lived approximately 15 million  
335 years ago (mya). The MRCA of the *Pseudomonas* strains lived  
336 approximately 100 mya and *E. coli* and *Pseudomonas* diverged  
337 about 600 mya. Hence, the REPIN populations in our selected  
338 bacteria have been evolving independently of each other for a  
339 very long time. RAYTs, the genes that mobilize REPINs in *E.*  
340 *coli* and *Pseudomonas*, are also very different in *E. coli* and *Pseu-*  
341 *domonas* and belong to two different gene classes (Bertels and  
342 Rainey 2011b). There is no detectable sequence conservation in  
343 the nucleotide sequence and very little sequence conservation  
344 in the aminoacid sequence apart from the catalytic center of the  
345 protein.

### 346 **Divergent bacteria have divergent REPIN populations**

347 The divergence between the different bacterial strains is also  
348 reflected in the similarity between the most abundant 25bp long  
349 sequences (REP sequences). The most common sequences in  
350 *E. coli* are almost all identical, except for that of UTI89, where  
351 the most common sequence is shifted by one nucleotide with  
352 respect to the other *E. coli* sequences (File S2). But all *E. coli*  
353 REP sequences are very different to all of the *Pseudomonas* REP  
354 sequences. Among the *Pseudomonas* strains, the REP sequences  
355 from *P. fluorescens* A506 and *P. fluorescens* BG33R are almost iden-  
356 tical (again shifted by one nucleotide), which are also the most  
357 closely related strains. Despite this similarity, the population  
358 sizes and structures are completely different between the two  
359 strains (see population networks in File S3). This observation  
360 highlights the opportunity to study the evolution of entire pop-  
361 ulations instead of single strains, which is basically impossible  
362 for any other natural population.

363 REPIN populations in *E. coli* form relatively simple networks,  
364 consistent with a single fitness peak. In contrast, REPIN popula-  
365 tions from *Pseudomonas* form more complex networks, which is  
366 more consistent with a rugged fitness landscape (see sequence  
367 networks in File S3). The differences in the complexity of the se-  
368 quence network may stem from the fact that there is only a single  
369 RAYT gene in *E. coli*, but there are usually multiple RAYT genes  
370 in *Pseudomonas*. If we assume that the activities of multiple RAYT  
371 genes can interfere with each other, then generalist sequences  
372 that can be moved by multiple RAYT genes will evolve, and give  
373 rise to a complex sequence network.

374 Although the the divergence between *E. coli* and *Pseudomonas*  
375 are very large and the differences between the structure of the  
376 REPIN (File S4, whether the REPIN is symmetric as in *Pseu-*  
377 *domonas* or not as in *E. coli*) and the corresponding transposase  
378 are tremendous (Bertels and Rainey 2011b) the inferred REPIN  
379 population sizes are surprisingly similar (Figure 4B). REPIN  
380 populations in *E. coli* range between 165 (UMN026) and 242  
381 (MG1655) members. REPIN populations in *Pseudomonas* are  
382 spread more widely and range between 23 (DC3000) and 309  
383 (A506) members. The population size has a strong effect on  
384 whether the master sequence can persist within the population  
385 or whether it will die out. Our simulations show that among all  
386 *Pseudomonas* REPIN populations only that of *P. fluorescens* A506  
387 and *P. fluorescens* SBW25 are large enough to persist over long

388 periods of time. In *E. coli*, in contrast, most populations persist  
389 over  $10^5$  time steps (Figure 4C).

### 390 **Small REPIN populations in *Pseudomonas***

391 *P. syringae* DC3000 is different from the other *Pseudomonas* strains  
392 not only the REPIN population is particularly small (only 23  
393 members), which leads to a particularly unstable REPIN popula-  
394 tion (Figure 4C). Another notable feature of the DC3000 REPIN  
395 population is that a large part of the repetitive sequences does  
396 not form REPINs (File S4). This suggests to us that the DC3000  
397 REPIN population may be a dead or dying population, which  
398 is slowly disintegrating due to genetic drift. This hypothesis  
399 is further supported by the observation that the only RAYT in  
400 DC3000 is not flanked by the most common 25bp long sequence  
401 in the genome, which is the case for all other population we have  
402 analyzed (File S2) and has been a defining feature of the REPIN-  
403 RAYT system (Bertels and Rainey 2011b). Together, our data  
404 suggests that the reason for the small and unstable REPIN pop-  
405 ulation in DC3000 is that it is slowly disintegrating over time.  
406 Hence the population is probably not in equilibrium, which  
407 means that the inferred duplication rates may not be accurate.

408 The populations found in BG33R and GB1 are also too small  
409 to persist for extended periods of time. However, in contrast  
410 to DC3000, they are also the two populations with the highest  
411 inferred duplication rate, and in both cases the most common  
412 25bp long sequence does flank a RAYT gene and both popula-  
413 tions consist mostly of REPINs (File S4). Hence there is no sign  
414 of population disintegration. The inferred high duplication rates  
415 are likely to evolve for small populations, because the mutation  
416 load for small populations is comparatively small. This suggests  
417 that these two populations may be growing.

### 418 **REPIN populations in competition**

419 The population network in BG33R is particularly interesting as  
420 it contains two similar sized population (126 and 147 members)  
421 and the REPIN master sequence consists in both cases of two  
422 identical 25mers that occur both exactly 160 times in the genome  
423 and differ in 5 nucleotide positions (i.e. the REPIN master se-  
424 quence differs in 10 positions). When inferring the fitness of  
425 the master sequence for both populations, then we also get very  
426 similar and extremely high duplication rates of  $32 \times 10^{-9}$  and  
427  $37 \times 10^{-9}$ . One would expect the evolution of high duplication  
428 rates not only for growing populations but also for populations  
429 that are competing for space in the genome. With space we are  
430 referring to regions in the genome that are fitness neutral, i.e.  
431 regions of the genome that incur no fitness cost when inserted  
432 into.

### 433 **REPIN populations in *E. coli***

434 In *E. coli* the most abundant 25bp long sequences do not form  
435 symmetric REPINs as observed in *Pseudomonas* (File S4). This  
436 could lead us to the conclusion, as for DC3000, that *E. coli* does  
437 not contain any REPIN populations that are alive. However  
438 there are a few differences to DC3000. First of all, RAYTs in *E.*  
439 *coli* are very distantly related to RAYTs in most *Pseudomonas*,  
440 which leaves the possibility that REPINs in *E. coli* are structured  
441 differently to REPINs in *Pseudomonas*. Second, there is not a  
442 single instance of a REPIN in any of the five *E. coli* populations.  
443 If *E. coli* REPIN populations were dying populations, then all  
444 populations in *E. coli* were already dead. This either happened  
445 about 15mya, when the last common ancestor of the five *E.*  
446 *coli* strains lived or it happened recently simultaneously. If it

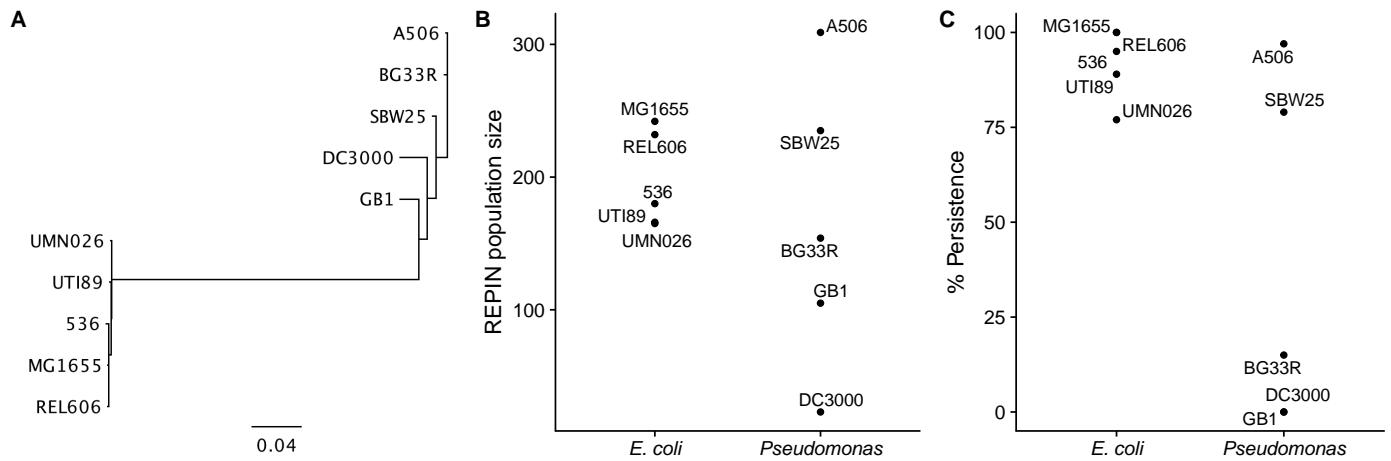

**Figure 4** REPIN populations in other bacteria. (A) 16S tree showing the phylogenetic relationship between REPIN containing bacteria selected in our study. The scale bar shows the number of substitutions per nucleotide site. (B) REPIN population sizes in *E. coli* and *Pseudomonas*. (C) Proportion of 100 simulations where at least 10% of all sequences are maintained as master sequence at the end of the simulation.

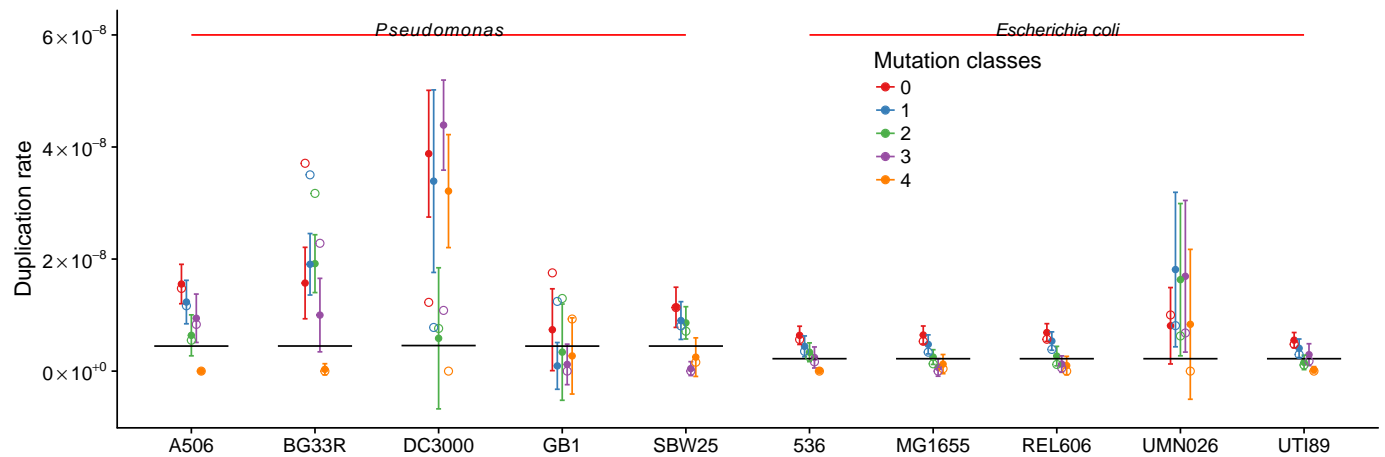



447 happened 15mya, then we would expect the population to have  
448 vanished by now and not consist of up to 242 members. It  
449 also seems unlikely that it happened recently in all strains at  
450 the same time and within the same time frame all the REPINs  
451 vanished but the singlets remained. Finally, the most common  
452 25bp long sequences in the five strains does still flank the RAYT  
453 gene something that is not the case for DC3000 but for all other  
454 REPIN populations in our study (File S2).

#### 455 **REPIN duplication rate is close to the error threshold**

456 The duplication rates of the master sequences are in the range  
457 of  $5 \times 10^{-9}$  and  $37 \times 10^{-9}$  and  $5 \times 10^{-9}$  and  $15 \times 10^{-9}$  when ex-  
458 cluding unstable populations. Considering that the rates were in-  
459 ferred for very different species and the species contain very dif-  
460 ferent transposases that disperse the REPIN populations, these  
461 values are very similar. This may be due to at least two reasons.  
462 First, the duplication rate is very close to its lower possible limit,  
463 because the number of mutations that occur on average between  
464 two duplication events is between 0.12 and 0.39 for *Pseudomonas*  
465 (0.29 and 0.39 without unstable populations) and between 0.22  
466 and 0.46 for *E. coli* (0.39 and 0.46 without UMN026). If on aver-  
467 age one mutation occurs between two duplication events, then it  
468 is impossible to maintain a master sequence. For our model  
469 a master sequence cannot be maintained above a frequency of  
470 1% when the duplication rate of the master sequence and all  
471 other sequences is equal or lower than  $2.2 \times 10^{-9}$  for *E. coli* and  
472  $4.4 \times 10^{-9}$  for *Pseudomonas* (File S5 and Figure 5). Second, each  
473 duplication event can be seen as a mutation that is introduced at  
474 a random position in the genome. This means that an increase  
475 in the duplication rate would also increase the mutational load  
476 for the host organism. Hence, similar to selection for replica-  
477 tion fidelity (Lynch *et al.* 2016), selection will favor organisms  
478 with decreased REPIN duplication rates, but is limited by the  
479 power of random genetic drift. The REPIN duplication rates we  
480 inferred are probably the result of these two opposing forces.

#### 481 **Maintenance of the REPIN-RAYT system**

482 The low duplication rate we inferred for all REPIN populations  
483 also suggests that REPIN sequences have been part of bacterial  
484 genomes for a very long time. This again raises the question of  
485 how and why they are maintained. There are two explanations:  
486 (1) the REPIN-RAYT system is frequently transmitted horizon-  
487 tally or (2) they provide a benefit to the host organism (Bichsel  
488 *et al.* 2013).

489 It is possible that the REPIN-RAYT system does get horizon-  
490 tally transferred from time to time. However, horizontal trans-  
491 fers are likely to be rare, because in order to establish a novel  
492 REPIN population in a new host both the transposase (RAYT)  
493 and the REPIN have to be transferred. This process is probably  
494 facilitated by the fact that RAYTs are usually flanked by REPINs  
495 (Bertels and Rainey 2011b). However, the rarity of these events  
496 is consistent with the observation that the establishment of a  
497 population that is as diverse as the REPIN population in SBW25  
498 will take thousands of years. Hence it seems unlikely that hori-  
499 zontal transfers are frequent enough to explain the ubiquitous  
500 presence of the REPIN-RAYT system in bacteria.

501 Alternatively, the REPIN-RAYT system may be maintained  
502 because it provides a selective advantage to the host bacterium.  
503 For individual REP sequences there have been many studies on  
504 potential benefits (Liang *et al.* 2015; Higgins *et al.* 1988; Espéli  
505 *et al.* 2001). However, local benefits are unlikely to outweigh  
506 the detrimental effects of transposition into genes or regulatory

507 regions let alone explain the maintenance of the REPIN-RAYT  
508 system. It seems more likely that the REPIN-RAYT system pos-  
509 sesses a function other than the dispersion of REPINs that is  
510 beneficial for the host bacterium.

511 **Acknowledgements.** All authors acknowledge the generous  
512 funding from the Max Planck Society.

#### 513 **Literature Cited**

- 514 Aranda-Olmedo, I., R. Tobes, M. Manzanera, J. L. Ramos, and  
515 S. Marqués, 2002 Species-specific repetitive extragenic palin-  
516 dromic (REP) sequences in *Pseudomonas putida*. *Nucleic*  
517 *acids research* **30**: 1826–1833.
- 518 Bertels, F. and P. B. Rainey, 2011a Curiosities of REPINs and  
519 RAYTs. *Mobile genetic elements* **1**: 262–268.
- 520 Bertels, F. and P. B. Rainey, 2011b Within-genome evolution of  
521 REPINs: a new family of miniature mobile DNA in bacteria.  
522 *PLoS Genetics* **7**: e1002132.
- 523 Bichsel, M., A. D. Barbour, and A. Wagner, 2013 Estimating the  
524 fitness effect of an insertion sequence. *Journal of mathematical*  
525 *biology* **66**: 95–114.
- 526 Bull, J. J., L. A. Meyers, and M. Lachmann, 2005 Quasispecies  
527 made simple. *PLoS Computational Biology* **1**: 450–460.
- 528 Bureau, T. E. and S. R. Wessler, 1994 Stowaway: a new family  
529 of inverted repeat elements associated with the genes of both  
530 monocotyledonous and dicotyledonous plants. *The Plant cell*  
531 **6**: 907–916.
- 532 Domingo, E. and P. Schuster, 2016 *Quasispecies: From Theory to*  
533 *Experimental Systems*, volume 392. Springer.
- 534 Eigen, M., 1971 Selforganization of matter and the evolution  
535 of biological macromolecules. *Die Naturwissenschaften* **58**:  
536 465–523.
- 537 Eigen, M. and P. Schuster, 1977 The hypercycle. a principle of  
538 natural self-organization. part a: Emergence of the hypercycle.  
539 *Die Naturwissenschaften* **64**: 541–565.
- 540 Espéli, O., L. Moulin, and F. Boccard, 2001 Transcription atten-  
541 uation associated with bacterial repetitive extragenic BIME  
542 elements. *Journal of Molecular Biology* **314**: 375–386.
- 543 Ewens, W. J., 1979 *Mathematical Population Genetics*. Springer,  
544 Berlin.
- 545 Higgins, C. F., G. F.-L. Ames, W. M. Barnes, J. M. Clement, and  
546 M. Hofnung, 1982 A novel intercistronic regulatory element  
547 of prokaryotic operons. *Nature* **298**: 760–762.
- 548 Higgins, C. F., R. S. McLaren, and S. F. Newbury, 1988 Repetitive  
549 extragenic palindromic sequences, mRNA stability and gene  
550 expression: evolution by gene conversion? — a review. *Gene*  
551 **72**: 3–14.
- 552 Jurka, J., V. V. Kapitonov, O. Kohany, and M. V. Jurka, 2007 Repet-  
553 itive sequences in complex genomes: structure and evolution.  
554 *Annual review of genomics and human genetics* **8**: 241–259.
- 555 Liang, W., K. E. Rudd, and M. P. Deutscher, 2015 A Role for  
556 REP Sequences in Regulating Translation. *Molecular cell* **58**:  
557 431–439.
- 558 Lynch, M., M. S. Ackerman, J.-F. Gout, H. Long, W. Sung, W. K.  
559 Thomas, and P. L. Foster, 2016 Genetic drift, selection and the  
560 evolution of the mutation rate. *Nature Reviews Genetics* **17**:  
561 704–714.
- 562 Mahillon, J. and M. Chandler, 1998 Insertion sequences. *Microbi-*  
563 *ology and Molecular Biology Reviews* **62**: 725–774.
- 564 Nowak, M. A., 1992 What is a quasispecies? *Trends in Ecology*  
565 *and Evolution* **7**: 118–121.
- 566 Nunvar, J., T. Huckova, and I. Licha, 2010 Identification and  
567 characterization of repetitive extragenic palindromes (REP)-



- 568 associated tyrosine transposases: implications for REP evolu-  
569 tion and dynamics in bacterial genomes. *BMC Genomics* **11**:  
570 44.
- 571 Ochman, H., S. Elwyn, and N. A. Moran, 1999 Calibrating bac-  
572 terial evolution. *Proceedings of the National Academy of Sci-*  
573 *ences* **96**: 12638–12643.
- 574 Ochman, H. and A. C. Wilson, 1987 Evolution in bacteria: ev-  
575 idence for a universal substitution rate in cellular genomes.  
576 *Journal of Molecular Evolution* **26**: 74–86.
- 577 Oggioni, M. R. and J.-P. Claverys, 1999 Repeated extragenic se-  
578 quences in prokaryotic genomes: a proposal for the origin and  
579 dynamics of the RUP element in *Streptococcus pneumoniae*.  
580 *Microbiology* **145**: 2647–2653.
- 581 Page, K. M. and M. A. Nowak, 2002 Unifying evolutionary dy-  
582 namics. *Journal of Theoretical Biology* **219**: 93–98.
- 583 Seifert, D., F. Di Giallonardo, K. J. Metzner, H. F. Günthard, and  
584 N. Beerenwinkel, 2015 A framework for inferring fitness land-  
585 scapes of patient-derived viruses using quasispecies theory.  
586 *Genetics* **199**: 191–203.
- 587 Silby, M. W., A. M. Cerdeño-Tárraga, G. S. Vernikos, S. R. Gid-  
588 dens, R. W. Jackson, G. M. Preston, X.-X. Zhang, C. D. Moon,  
589 S. M. Gehrig, S. A. Godfrey, C. G. Knight, J. G. Malone,  
590 Z. Robinson, A. J. Spiers, S. Harris, G. L. Challis, A. M. Yaxley,  
591 D. Harris, K. Seeger, L. Murphy, S. Rutter, R. Squares, M. A.  
592 Quail, E. Saunders, K. Mavromatis, T. S. Brettin, S. D. Bentley,  
593 J. Hothersall, E. Stephens, C. M. Thomas, J. Parkhill, S. B. Levy,  
594 P. B. Rainey, and N. R. Thomson, 2009 Genomic and genetic  
595 analyses of diversity and plant interactions of *Pseudomonas*  
596 *fluorescens*. *Genome biology* **10**: R51.
- 597 Stern, M. J., G. F.-L. Ames, N. H. Smith, E. C. Robinson, and C. F.  
598 Higgins, 1984 Repetitive extragenic palindromic sequences: A  
599 major component of the bacterial genome. *Cell* **37**: 1015–1026.
- 600 Ton-Hoang, B., P. Siguier, Y. Quentin, S. Onillon, B. Marty,  
601 G. Fichant, and M. Chandler, 2012 Structuring the bacte-  
602 rial genome: Y1-transposases associated with REP-BIME se-  
603 quences. *Nucleic acids research* **40**: 3596–3609.
- 604 Touchon, M., C. Hoede, O. Tenaillon, V. Barbe, S. Baeriswyl,  
605 P. Bidet, E. Bingen, S. Bonacorsi, C. Bouchier, O. Bouvet, A. Cal-  
606 teau, H. Chiapello, O. Clermont, S. Cruveiller, A. Danchin,  
607 M. Diard, C. Dossat, M. El Karoui, E. Frapy, L. Garry, J. M.  
608 Ghigo, A. M. Gilles, J. Johnson, C. Le Bouguenec, M. Lescat,  
609 S. Mangenot, V. Martinez-Jehanne, I. Matic, X. Nassif, S. Oztas,  
610 M. A. Petit, C. Pichon, Z. Rouy, C. Saint Ruf, D. Schneider,  
611 J. Tourret, B. Vacherie, D. Vallenet, C. Medigue, Rocha, Ed-  
612 uardo P. C., and E. Denamur, 2009 Organised Genome Dynam-  
613 ics in the *Escherichia coli* Species Results in Highly Diverse  
614 Adaptive Paths. *PLoS Genetics* **5**.
- 615 van Dongen, S., 2000 A Cluster algorithm for graphs. *Report -*  
616 *Information systems* pp. 1–40.
- 617 Versalovic, J., T. Koeuth, and J. R. Lupski, 1991 Distribution of  
618 repetitive DNA sequences in eubacteria and application to  
619 fingerprinting of bacterial genomes. *Nucleic acids research* **19**:  
620 6823–6831.
- 621 Wessler, S. R., T. E. Bureau, and S. E. White, 1995 LTR-  
622 retrotransposons and MITEs: important players in the evolu-  
623 tion of plant genomes. *Current opinion in genetics & develop-*  
624 *ment* **5**: 814–821.
- 625 Wielgoss, S., J. E. Barrick, O. Tenaillon, S. Cruveiller, B. Chane-  
626 Woon-Ming, C. Medigue, R. E. Lenski, and D. Schneider, 2011  
627 Mutation Rate Inferred From Synonymous Substitutions in a  
628 Long-Term Evolution Experiment With *Escherichia coli*. *G3:*  
629 *Genes, Genomes, Genetics* **1**: 183–186.
